CORRECTION

## Correction: The effectiveness of mindfulness alone compared to exercise and mindfulness on fatigue in women with gynaecology cancer (GEMS): Protocol for a randomised feasibility trial

The *PLOS One* Staff

### Notice of Republication

An incomplete, earlier version of this article was published in error. The publisher apologises for the error. This article was republished on December 17, 2025, to correct for this error. Please download the article again to view the correct version. The originally published, uncorrected article and the republished, corrected article are provided here for reference.

### Supporting information

**S1 File. Originally published, uncorrected article.**  
(PDF)

**S2 File. Republished, corrected article.**  
(PDF)

### Reference

1. McCloy K, Hughes C, Dunwoody L, Marley J, Cleland I, Cruciani F, et al. The effectiveness of mindfulness alone compared to exercise and mindfulness on fatigue in women with gynaecology cancer (GEMS): Protocol for a randomised feasibility trial. *PLoS One*. 2023;18(10):e0278252. <https://doi.org/10.1371/journal.pone.0278252> PMID: [37883461](https://pubmed.ncbi.nlm.nih.gov/37883461/)

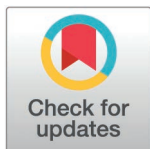

### OPEN ACCESS

**Citation:** The *PLOS One* Staff (2026) Correction: The effectiveness of mindfulness alone compared to exercise and mindfulness on fatigue in women with gynaecology cancer (GEMS): Protocol for a randomised feasibility trial. *PLoS One* 21(1): e0340148. <https://doi.org/10.1371/journal.pone.0340148>

**Published:** January 2, 2026

**Copyright:** © 2026 The *PLOS One* Staff. This is an open access article distributed under the terms of the [Creative Commons Attribution License](https://creativecommons.org/licenses/by/4.0/), which permits unrestricted use, distribution, and reproduction in any medium, provided the original author and source are credited.
